# Supplementary material
Source: PubMed Central journal article supplement (PMC5207189)

## SUPPLEMENTAL FIGURE LEGENDS

**Figure S1.FSK-stimulated Chloride secretion in Caco-2 cells.** Basolateral exposure of FSK resulted a rapid elevation of short circuit current (Isc), in Caco-2 monolayers mounted in Ussing Chambers compared to vehicle (DMSO). The arrows indicate the time of addition of each agent. Experiments were repeated at least 3 times and summarized results were expressed in inset. \*\*significant difference at  $P < 0.001$  compared to control (paired t-test).

**Figure S2. ATP but not Ace increased intracellular calcium in HEK 293 cells.** A, Image shown is HEK293 cells stably expressed mcherry-tagged mouse Ano6 grown onto cover glass for measurement of Fura 2 fluorescence. B, Dose and time course for ATP and C, Ace + ATP induced increase in  $[Ca^{2+}]_i$  in HEK 293 cells, as detected by ratiometric fura 2 fluorescence. Stimulation with ATP activates  $[Ca^{2+}]_i$  rise. Ace either alone or in combination with the ATP did not augment  $[Ca^{2+}]_i$  rise. Cells treated with  $1\mu M$  Ace followed by the addition of  $100\mu M$  ATP. Ace was not able to increase  $[Ca^{2+}]_i$  but subsequent addition of ATP evoked  $[Ca^{2+}]_i$  rise in these cells. Data are representative of three independent experiments. Scale bars:  $10\mu m$ .

**Figure S3. Deletion of KR motifs from N-terminus does not affect surface distribution of Ano6 in HEK 293 cells.** A, Western blot analysis (with GFP antibody) for protein expression of wild-type mAno6, KR motifs truncated Ano6, mutant Ano6 transiently expressed in HEK 293 cells. B, Confocal images demonstrate surface distribution of GFP-tagged Ano6, or KR motifs truncated, or mutants of Ano6 transfected within HEK293 cells. Schematics of different step-wise deletions or mutants of mAno 6 channel protein are presented corresponding to their confocal images. N-terminal deletion of KR motifs or mutation in these motifs did not mistarget the mAno6 channel to the surface. Red box represents potential  $PIP_2$  binding sites; the mutants are robustly expressed at the membrane surface. Scale bars:  $10\mu m$ .

**Figure S4. Ano 6 silencing in Caco-2 cells.** A, qPCR analysis of Ano6 expression in cells after lenti-shRNA transduction specific for Ano6 genes, which are shown as mRNA levels relative to levels of GAPDH. Values are means  $\pm$  S.E.. B, Inhibition of Isc in normal and after knockdown of Ano6 expression by lenti shRNA. \*\*significant difference at  $P < 0.001$  compared to control (paired t-test); NS, statistically not significant.

**Figure S5: Interaction of RhoA and PIP5K during Ano6 activation:** Endogenous RhoA and PIP5K interaction with mAno6-GFP was measured upon stimulation with Ace. RhoA (A) but not PIPK (B) co-immunoprecipitates with mANO6-GFP transiently expressed in HEK 293 cells. mANO6-GFP was immunoprecipitated by anti-GFP antibody followed by detection of Rho A and PIP5K by western blotting using anti-RhoA and anti-PIP5K antibody.(Input) 10% of mAno6-GFP

transfected HEK293 cell lysate. Representative GFP blots were presented (centre) to indicate the level of Ano6-GFP precipitation for these experiments.

Figure S1

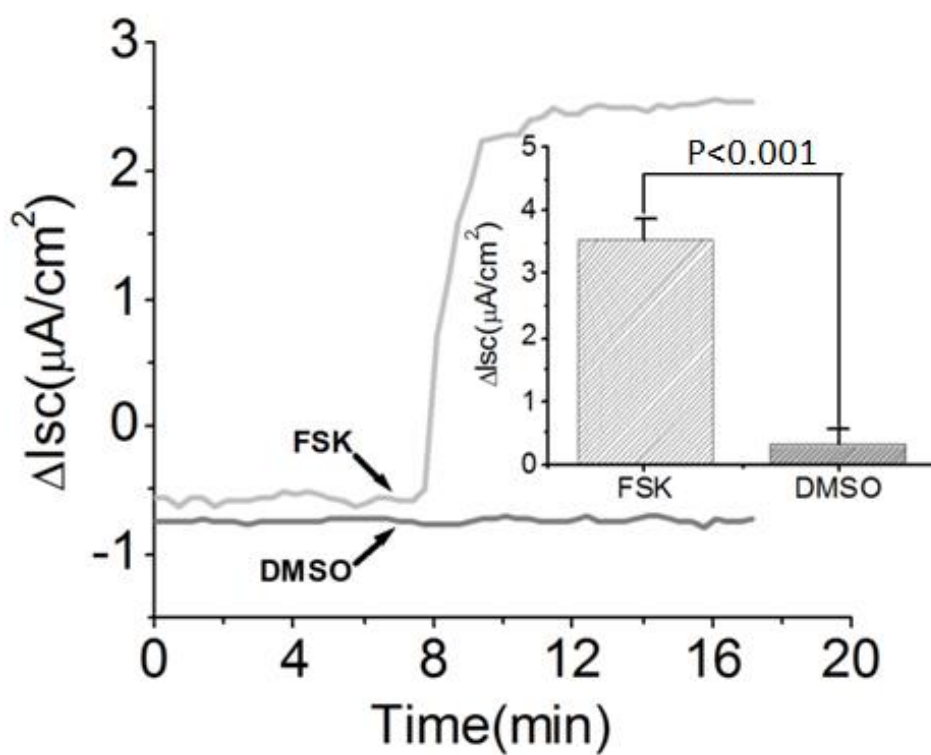

Figure S2

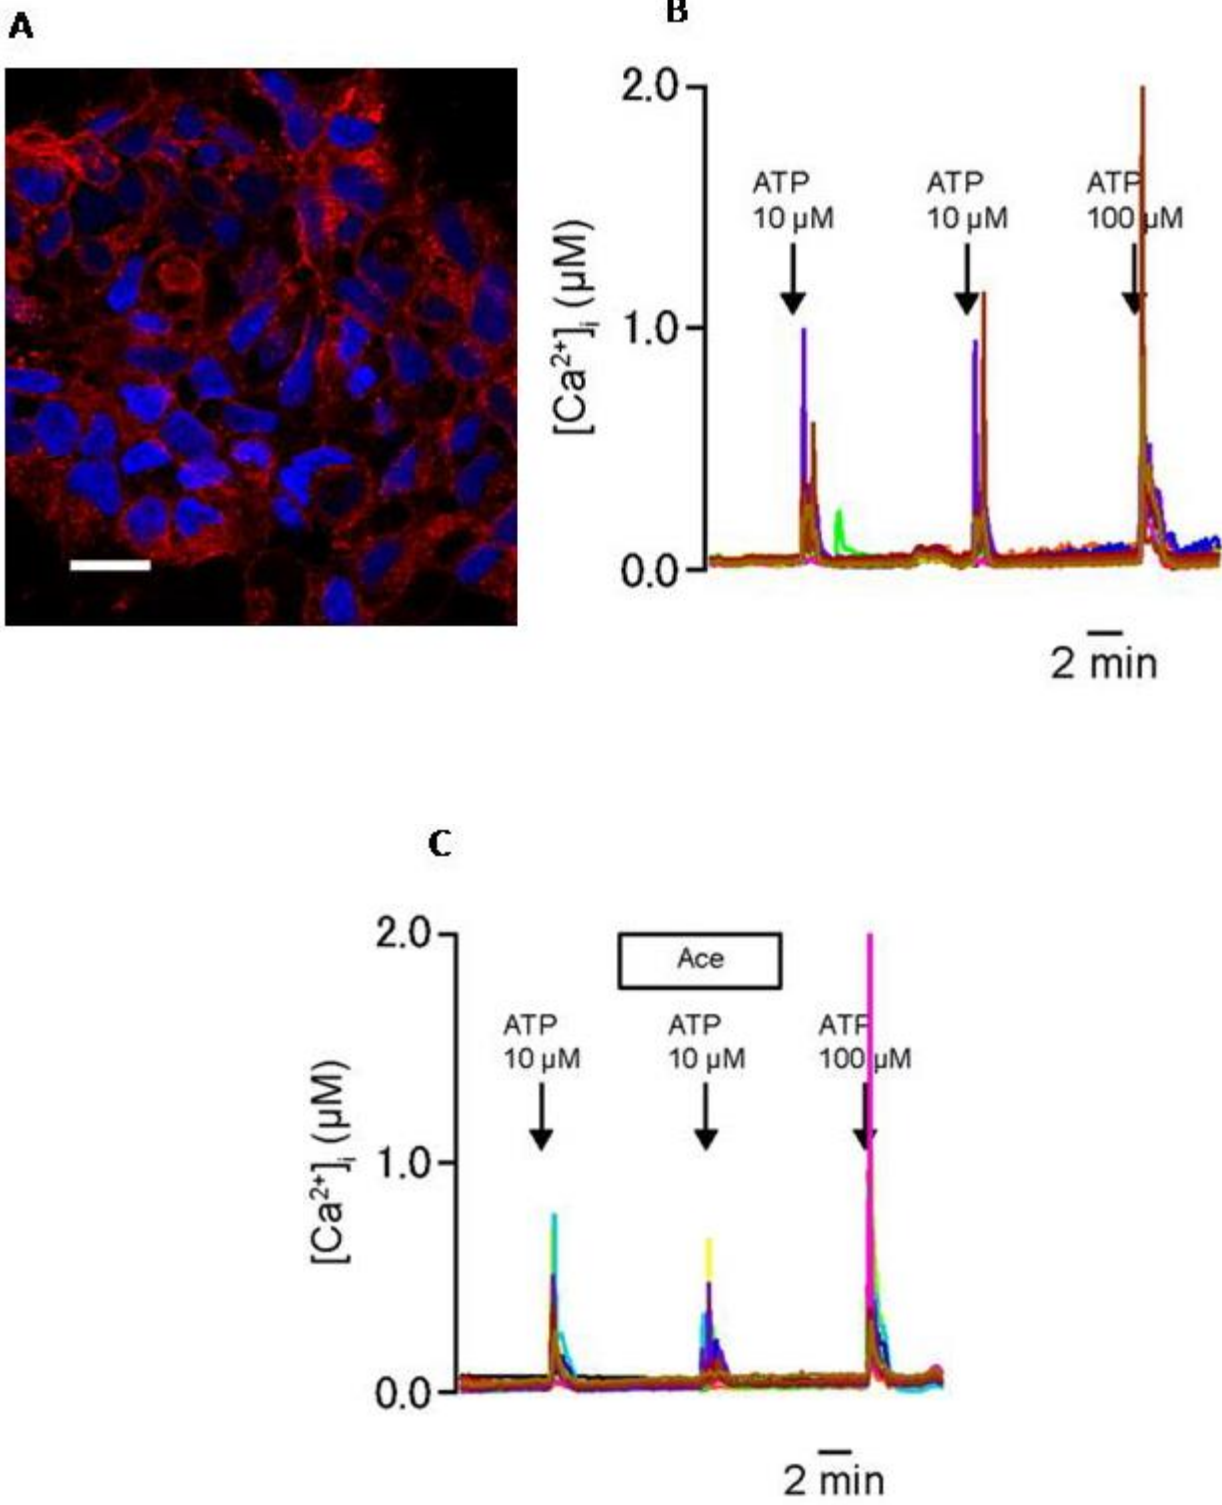

Figure S3

A

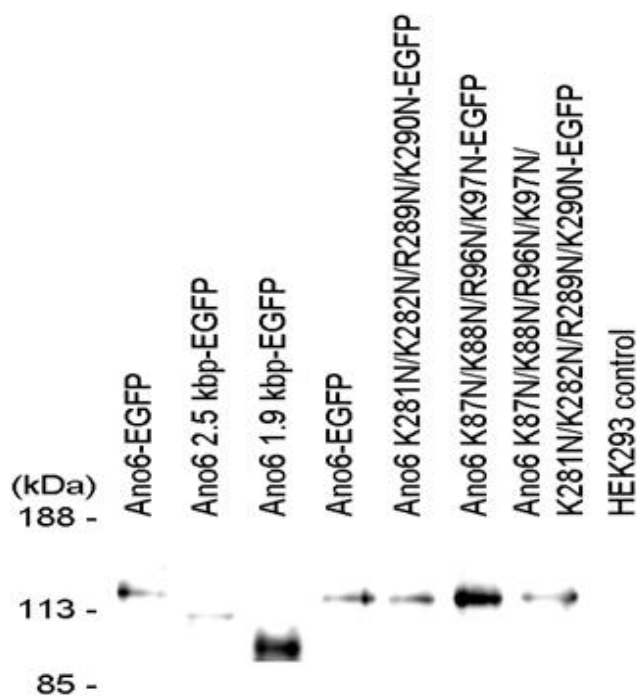

B

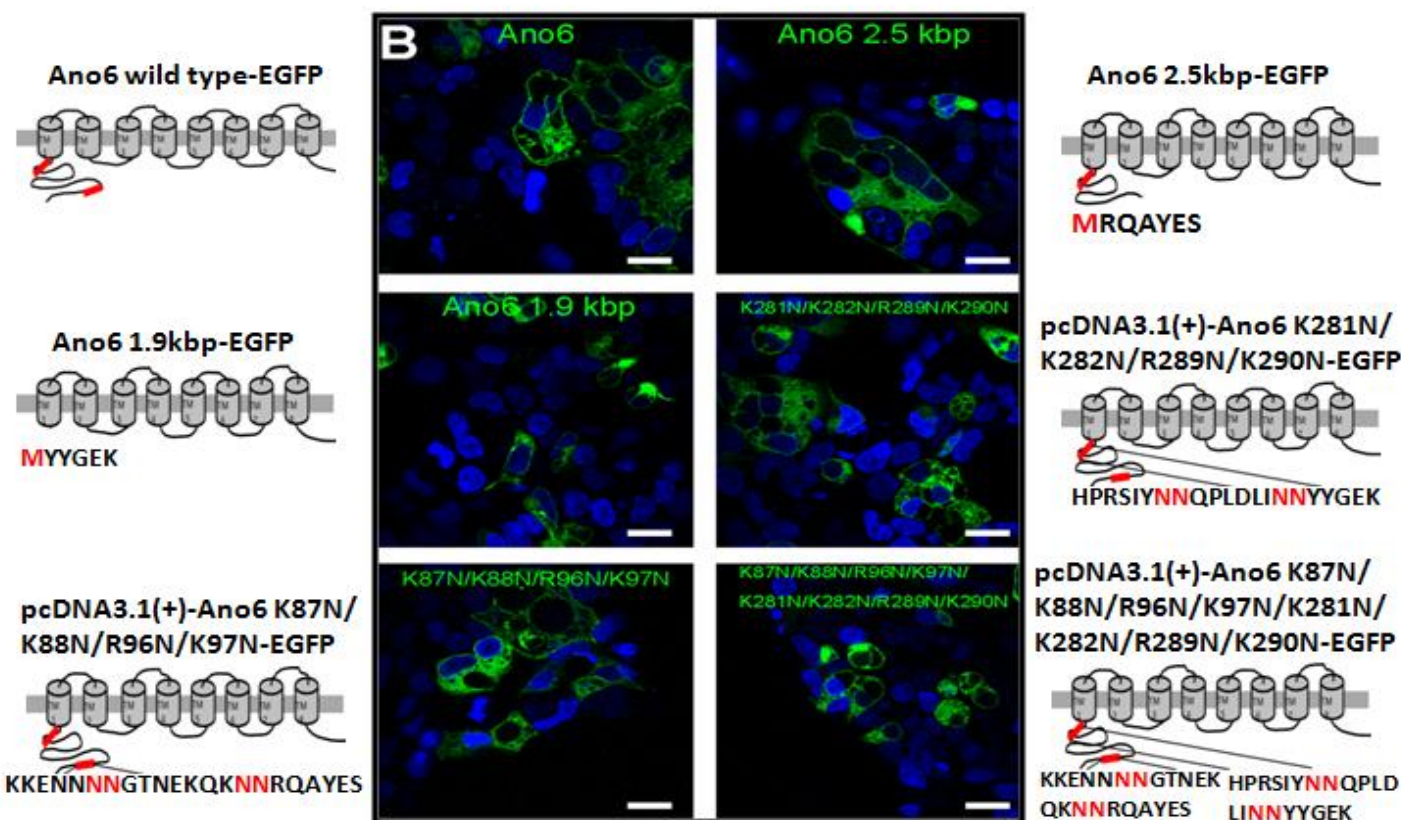

Figure S4

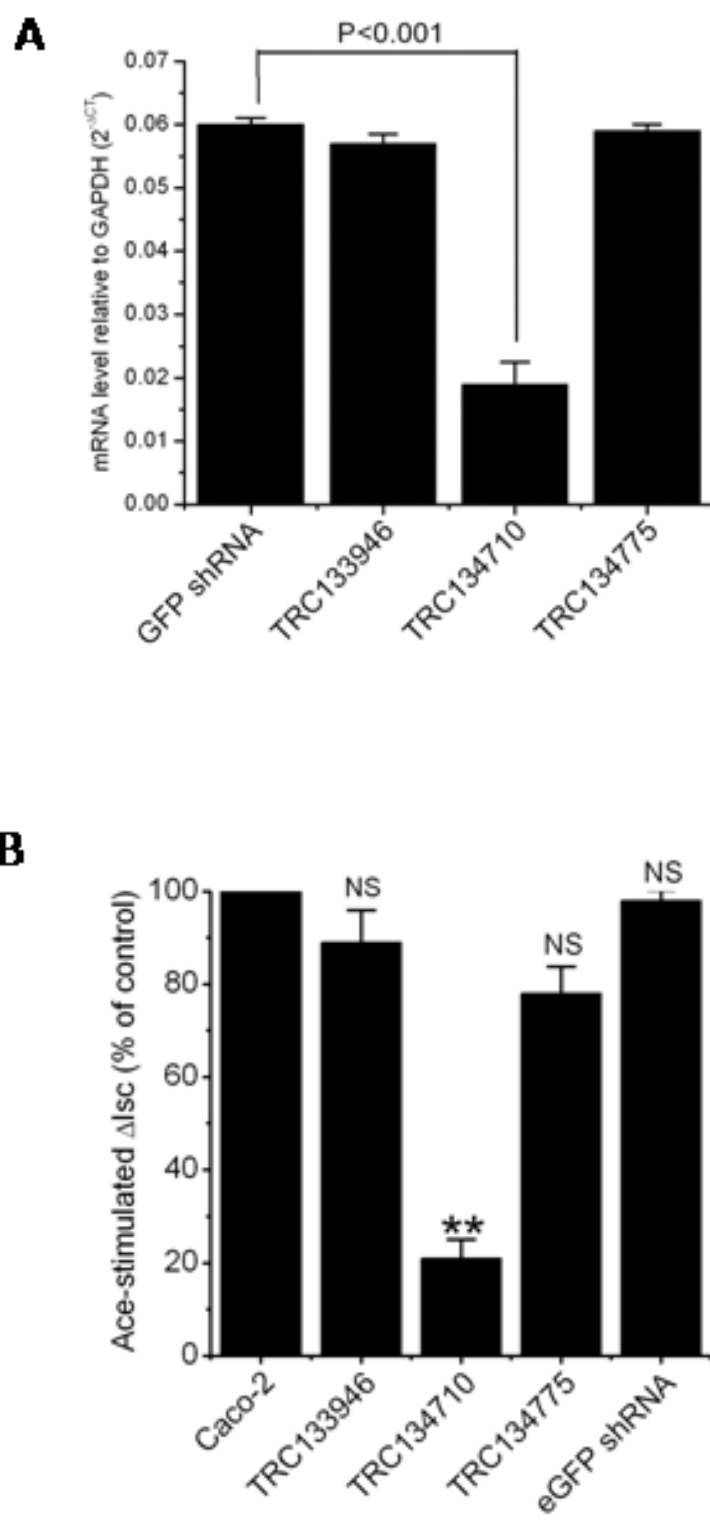

Figure S5

A

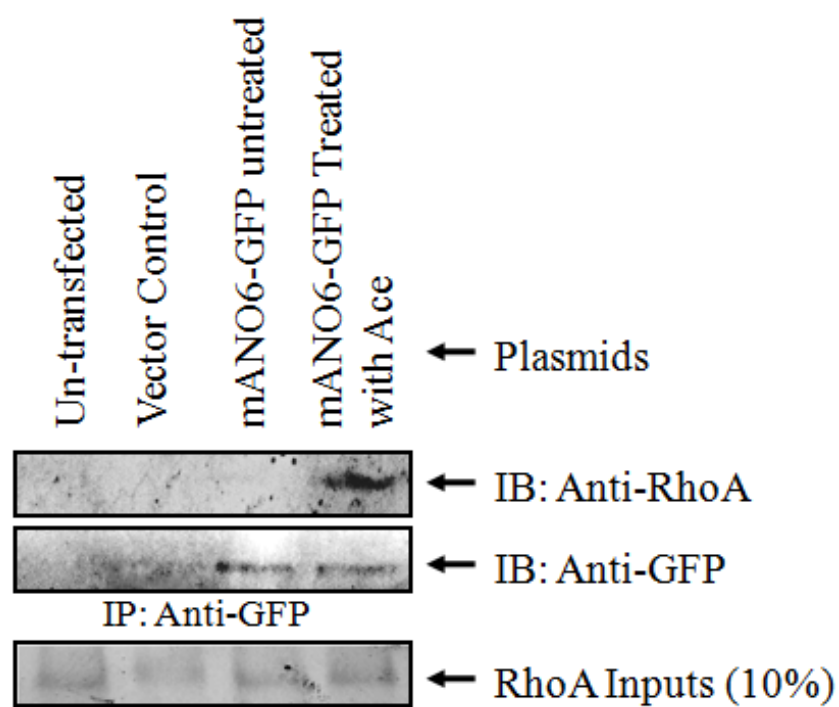

B

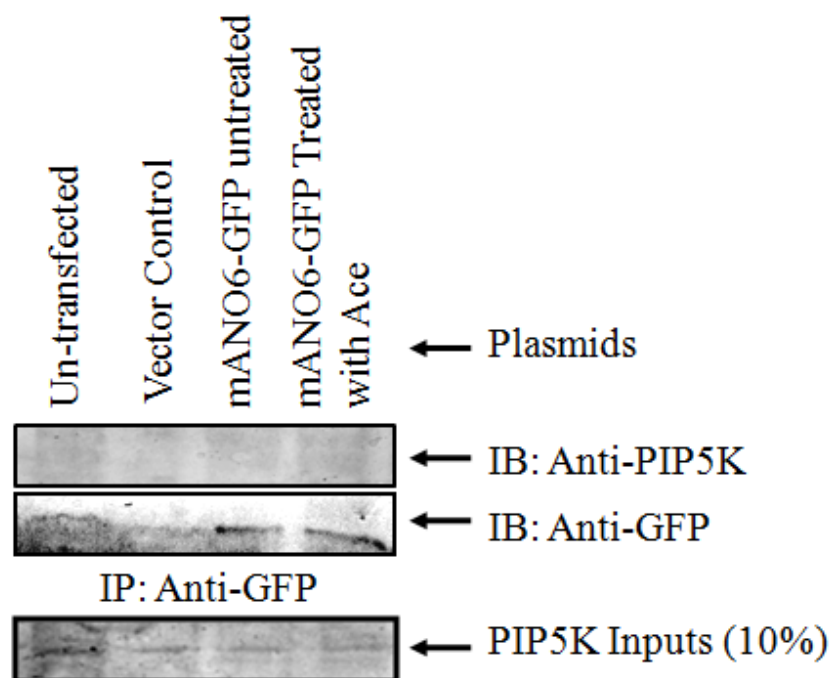

Supplement: 10.1074_M116.719823_jbc.M116.719823-1.pdf [file 10.1074_M116.719823_jbc.M116.719823-1.pdf]
